# Supplementary material for: Self-assembled and well separated B and N co-doped hierarchical carbon structures as high-capacity, ultra-stable, LIB anode materials
Source: Royal Society of Chemistry journal article supplement (doi:10.1039/c8se00542g), 2018-12-12
Supplement: c8se00542g1.pdf [file c8se00542g1.pdf]

## Supporting Information

### **Self-assembled and well separated B and N co-doped hierarchical carbon structures as high-capacity, ultra-stable, LIB anode materials**

*Jinliang Zhu\**, Pengcheng Wei, Julian Key, Shibin Yin, Shaojian Ma and Pei Kang Shen\*

*Collaborative Innovation Center of Renewable Energy Materials, Guangxi Key Laboratory of Processing for Non-Ferrous Metal and Featured materials, Guangxi Key Laboratory for Electrochemical Energy Materials, Guangxi University, Nanning 530004, PR China.*

\*Corresponding author E-mail: jlzhu@gxu.edu.cn (J. Zhu); stssp@mail.sysu.edu.cn (P. Shen). Fax: +86 07713237990, Tel: +86 07713237990.

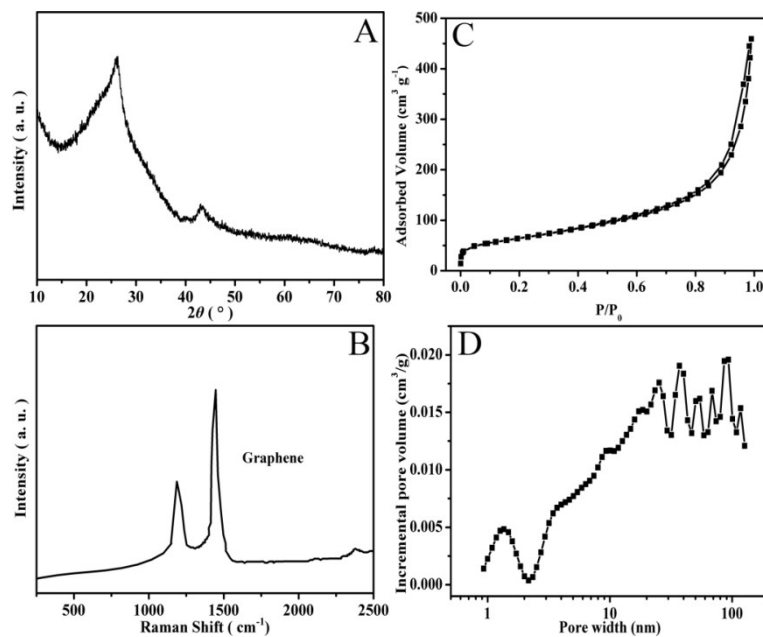

**Fig. S1** (A) XRD pattern, (B) Raman spectrum, (C)  $\text{N}_2$  adsorption-desorption isotherm and (D) pore size distribution curve of commercial graphene

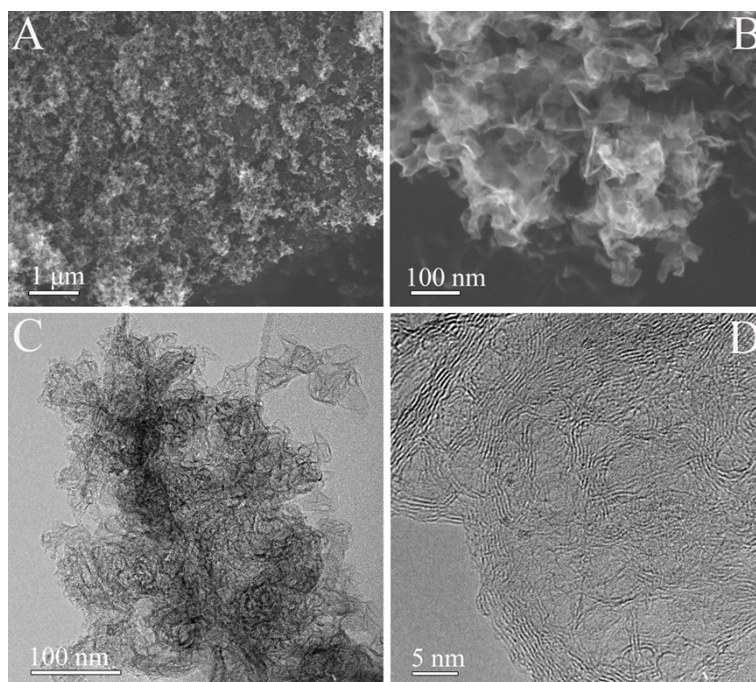

**Fig. S2** (A, B) SEM and (C, D) TEM images of commercial graphene

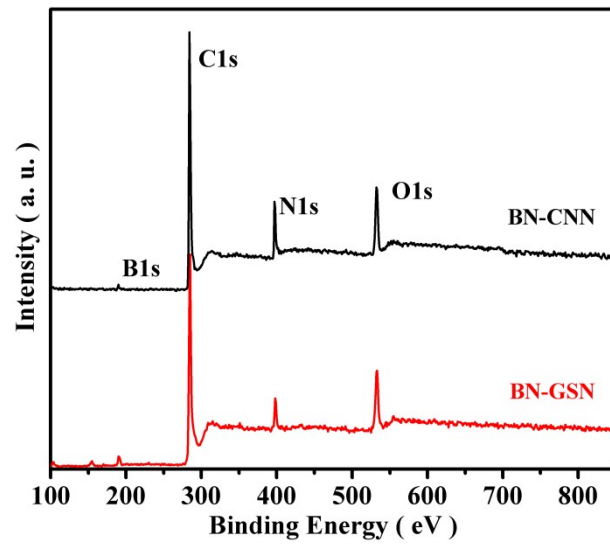

**Fig. S3** XPS spectra of BN-CNN and BN-GSN

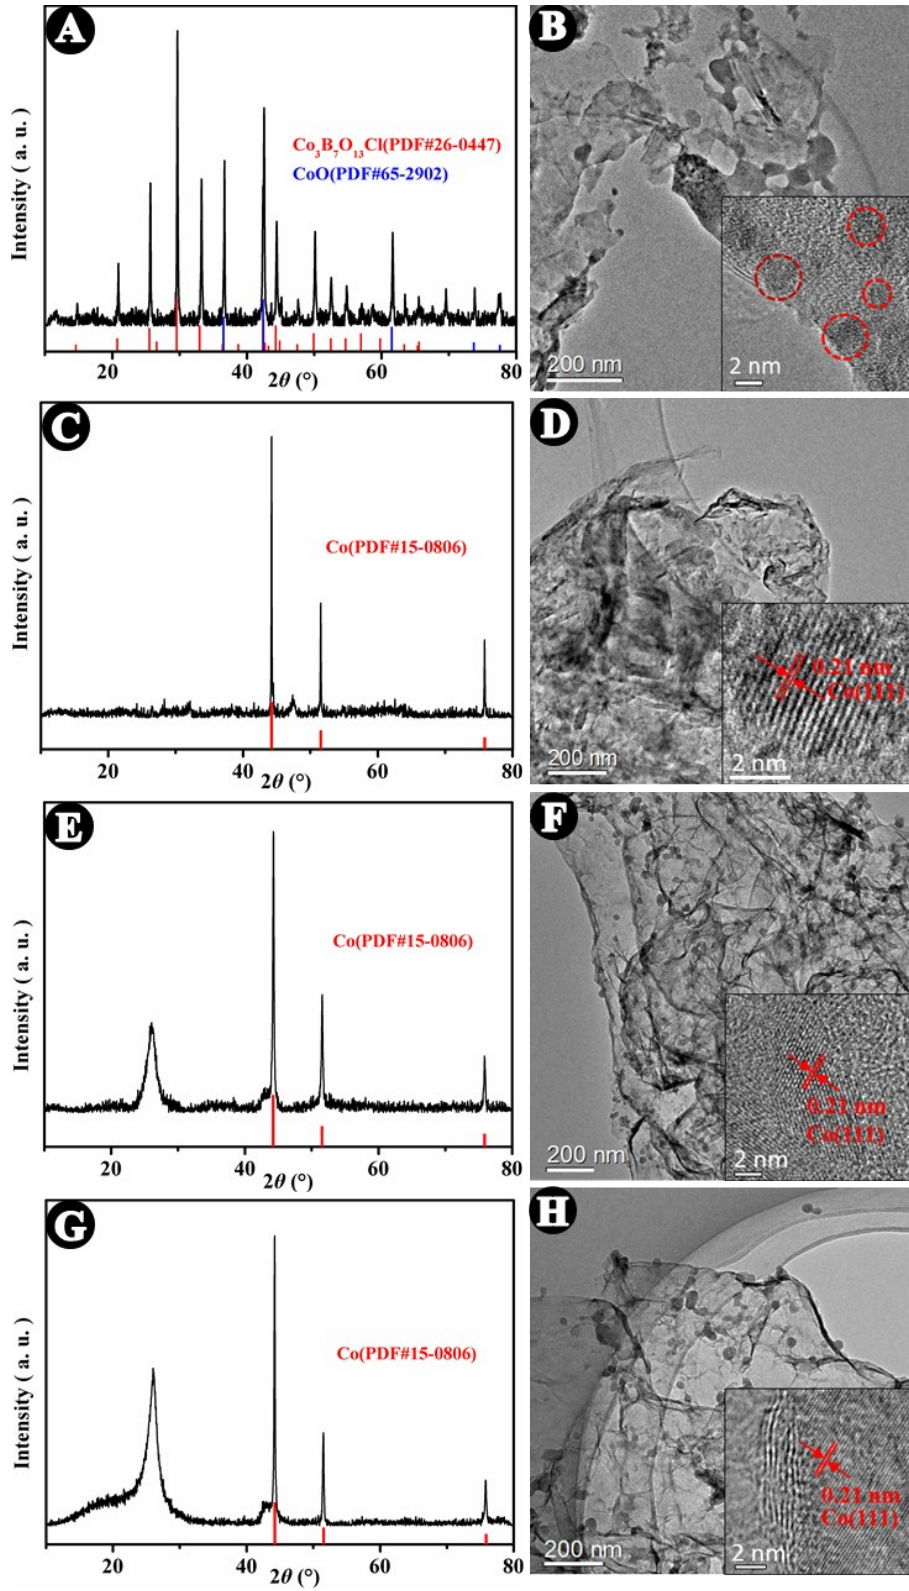

Fig. S4 XRD patterns and TEM images of BN-GSN at different temperatures: (A, B) 450 °C, (C, D) 600 °C, (E, F) 900 °C, and (G, H) 1000 °C.

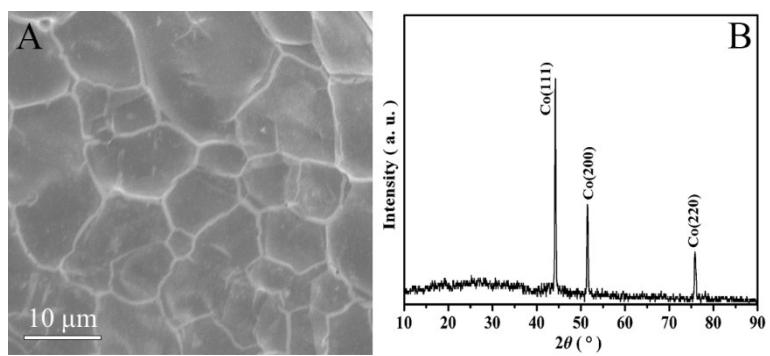

**Fig. S5** (A) TEM image and (B) XRD pattern of cobalt foil at 450  $^\circ\text{C}$

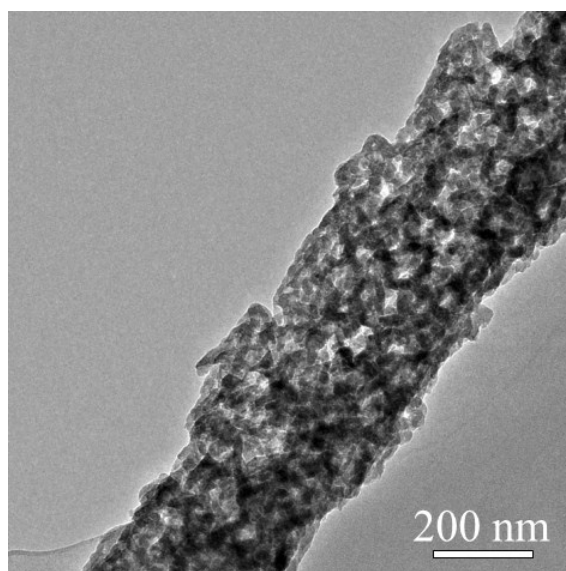

**Fig. S6** Enlarged SEM image (Fig.5E) of growing BN-CNN

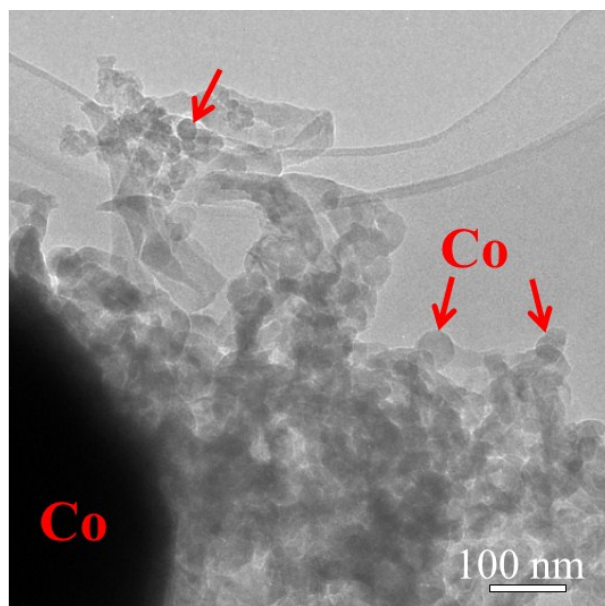

**Fig. S7** Enlarged TEM image (Fig.5E) of growing BN-CNN

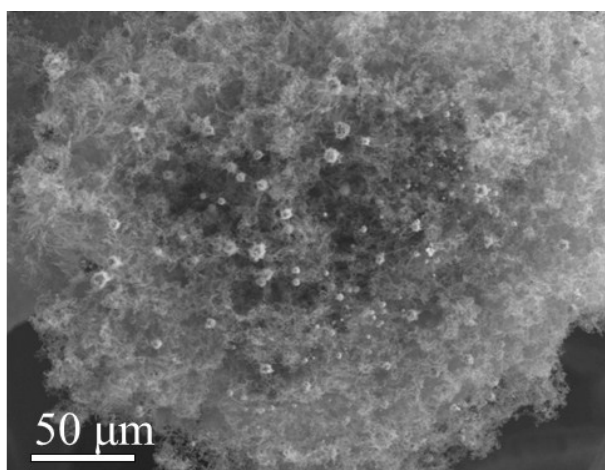

**Fig. S8** SEM image of BN-CNN

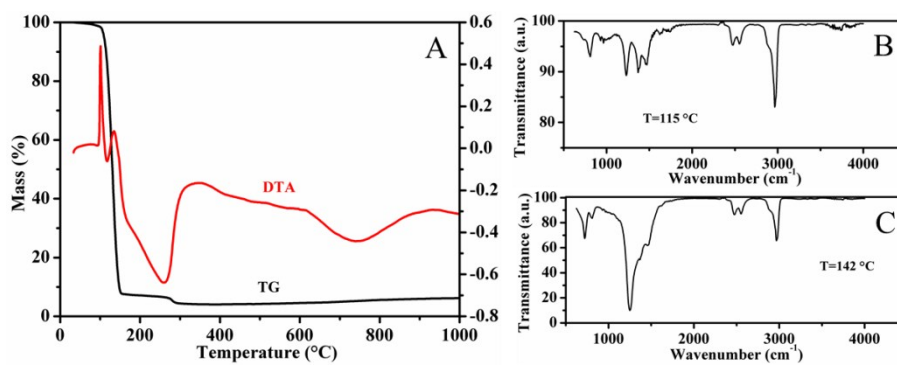

**Fig. S9** (A) TG-DTA of *tert*-butylamine borane in  $N_2$  from 25 °C to 1000 °C and (B, C) FTIR spectra of the corresponding pyrolysis products at 115 and 142 °C, respectively.

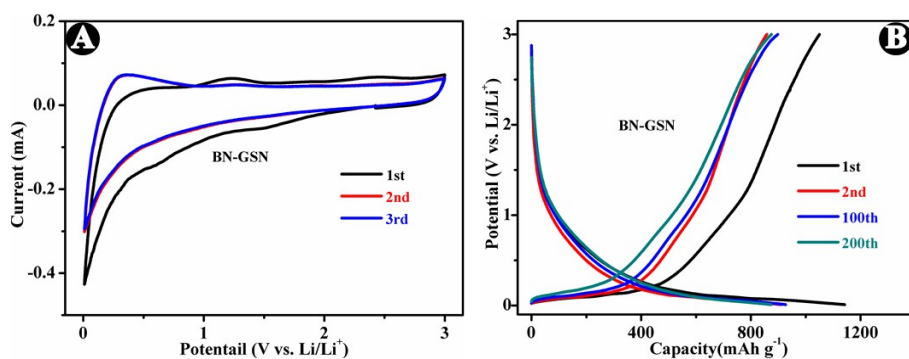

**Fig. S10** (A) Cyclic voltammograms and (B) voltage profiles of BN-GSN in a voltage range from 0.01 V to 3 V (vs Li/Li<sup>+</sup>)

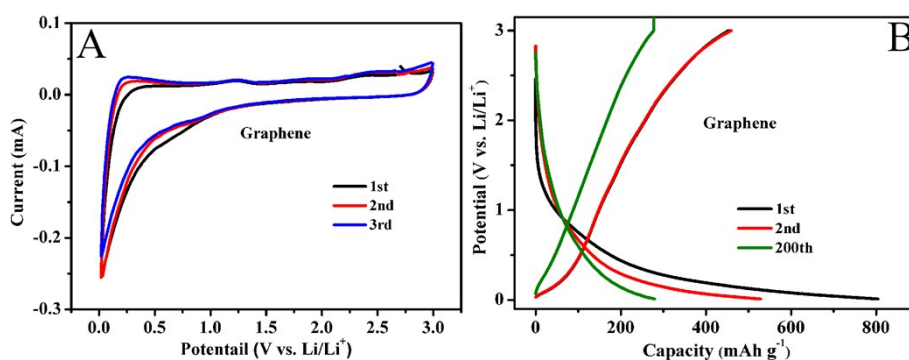

**Fig. S11** (A) Cyclic voltammograms and (B) voltage profiles of commercial graphene in a voltage range from 0.01 V to 3 V (vs Li/Li<sup>+</sup>)

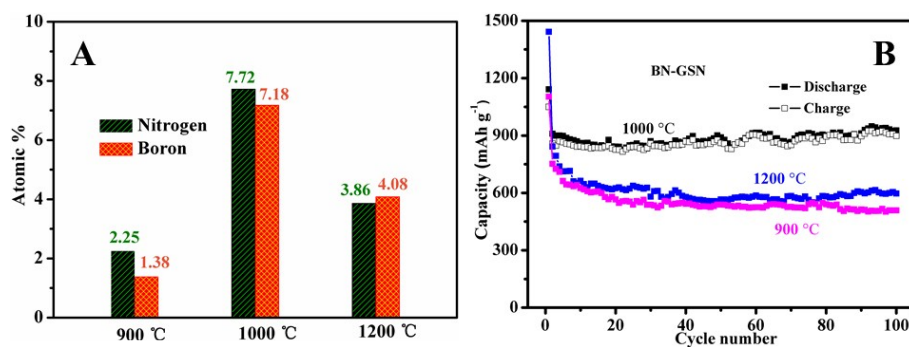

**Fig. S12** (A) Surface atomic ratios and (B) Cycle behaviors at 50 mA/g of BN-GSN (900), BN-GSN (1000) and BN-GSN (1200)

**Table S1** Electrolyte resistances and charge transfer resistances according to Nyquist plots of BN-CNN, BN-GSN, commercial graphene and graphite

| Sample   | $R_e$ ( $\Omega$ ) | $R_{ct}$ ( $\Omega$ ) |
|----------|--------------------|-----------------------|
| BN-CNN   | 2.3                | 3.8                   |
| BN-GSN   | 2.2                | 8.9                   |
| Graphene | 2.5                | 14.4                  |
| Graphite | 2.9                | 30.1                  |

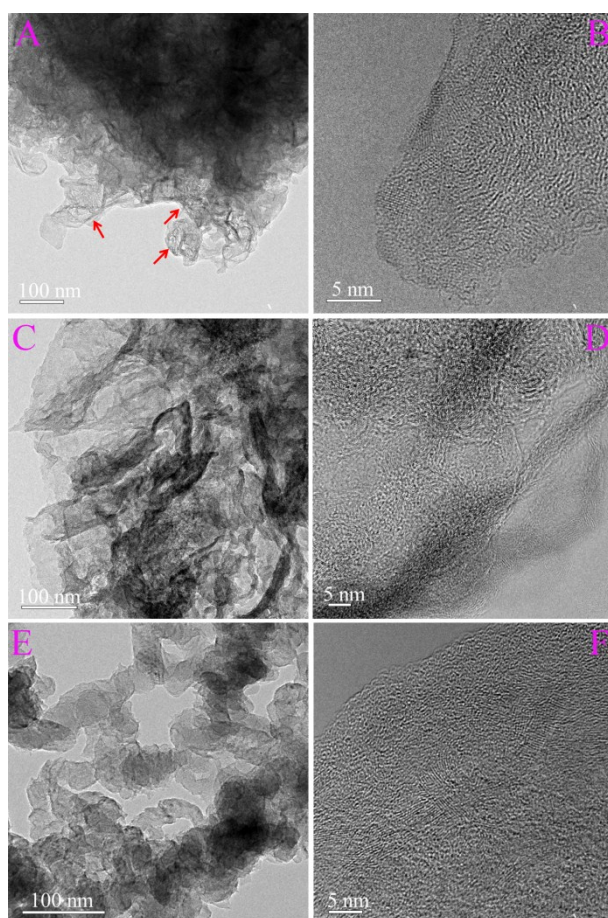

**Fig. S13** (A) TEM and HRTEM of commercial graphene (A, B), BN-GSN (C, D) and BN-CNN (E, F) after 200 cycles at  $0.05 \text{ A g}^{-1}$ .



**Table S2** Electrochemical performance of carbonaceous LIB anode materials

| Materials                                                  | Preparation strategy                                             | BET<br>(m <sup>2</sup> /g) | Rate<br>(mA/g) | First cycle<br>coulombic<br>efficiency | Reversible<br>capacity<br>(mAh/g) | Capacity<br>decay per<br>cycle |
|------------------------------------------------------------|------------------------------------------------------------------|----------------------------|----------------|----------------------------------------|-----------------------------------|--------------------------------|
| N-Doped CNFs <sup>[1]</sup>                                | Electrospinning, urea treatment                                  | 381                        | 30             | 82.8%                                  | 445                               | 0.16%                          |
| N-Doped CNFs <sup>[2]</sup>                                | Oxidative template assembly                                      | ---                        | 100            | 64.0%                                  | 668                               | 0.94%                          |
| Porous CNFs <sup>[3]</sup>                                 | Electrospinning, SiO <sub>2</sub> template                       | 950                        | 50             | 47.7%                                  | 730                               | 0.78%                          |
| CNFs-CNTs <sup>[4]</sup>                                   | Chemical vapor deposition, KOH activation                        | 1840                       | 100            | ~62.5%                                 | 1150                              | 0.35%                          |
| N-doped Graphitic porous CNFs <sup>[5]</sup>               | Electrospinning, Ni nanoparticle template                        | 538                        | 100            | 57.5%                                  | 1560                              | 0.34%                          |
| Graphitic porous CNFs <sup>[6]</sup>                       | Electrospinning, Fe nanoparticle template                        | 198                        | 100            | ~60%                                   | 983                               | 0.14%                          |
| N-Doped CNFs <sup>[7]</sup>                                | Chemical vapor deposition                                        | 108.1                      | 37.2           | 60%                                    | 500.0                             | ---                            |
| Porous CNFs <sup>[8]</sup>                                 | Biomass method, KOH activation                                   | 1235.6                     | 100            | 56%                                    | 1091.4                            | 0.21%                          |
| Porous CNFs <sup>[9]</sup>                                 | Electrospinning, air activation                                  | 583                        | 50             | ---                                    | 1950                              | 0.22%                          |
| N-doped graphene frameworks <sup>[10]</sup>                | MgO nanowire template                                            | 610                        | 200            | 52.3%                                  | 700                               | ---                            |
| N-doped porous graphene <sup>[11]</sup>                    | Pyrolysis of graphene oxide/mela-mine-formaldehyde, Ice template | 1170                       | 100            | 58%                                    | 672                               | ---                            |
| Porous graphene films <sup>[12]</sup>                      | Fe <sub>3</sub> C nanoparticle template                          | 36                         | 50             | ~36%                                   | 1062                              | 0.65%                          |
| Sulfur/nitrogen dual-doped porous graphene <sup>[13]</sup> | GO hydrothermal, thiourea treatment                              | 624.5                      | 50             | 75.99%                                 | 1109                              | 0.23%                          |

|                                                    |                                                           |       |           |        |             |                  |
|----------------------------------------------------|-----------------------------------------------------------|-------|-----------|--------|-------------|------------------|
| Graphene/N-doped carbon nanosheets <sup>[14]</sup> | Annealing Ppy/GO                                          | 327   | 100       | 57.3%  | 1100        | 0.20%            |
| Carbon nanoparticles <sup>[15]</sup>               | Soot deposition                                           | 133   | 100       | 55%    | 742         | 1.11%            |
| CNTs@3DG <sup>[16]</sup>                           | Ni/Co catalyzing resin, KOH activation                    | 1673  | 100       | 59%    | 1132        | 0.030%           |
| Carbon nanosheets <sup>[17]</sup>                  | Petroleum asphalt<br>NaCl/KCl                             | 11    | 100       | 53.9%  | 729         | ---              |
| HPCMs <sup>[18]</sup>                              | Carbonization of sucrose, MgAl-LDOs microsphere templates | 852.7 | 50        | 54.52% | 1140.5      | 0.18%            |
| BN-CNN (This work)                                 | Heat treatment, No extrinsic template                     | 785   | 50<br>500 | 73.6%  | 1017<br>756 | 0.016%<br>0.017% |

## References

- [1] S.-X. Wang, L. Yang, L.P. Stubbs, X. Li, C. He, *ACS applied materials & interfaces*, 5 (2013) 12275-12282.
- [2] Z. Wang, X. Xiong, L. Qie, Y. Huang, *Electrochimica Acta*, 106 (2013) 320-326.
- [3] D. Nan, J.-G. Wang, Z.-H. Huang, L. Wang, W. Shen, F. Kang, *Electrochemistry communications*, 34 (2013) 52-55.
- [4] Y. Chen, X. Li, K. Park, J. Song, J. Hong, L. Zhou, Y.-W. Mai, H. Huang, J.B. Goodenough, *Journal of the American Chemical Society*, 135 (2013) 16280-16283.
- [5] Y. Chen, X. Li, X. Zhou, H. Yao, H. Huang, Y.-W. Mai, L. Zhou, *Energy & Environmental Science*, 7 (2014) 2689-2696.
- [6] B. Zhang, Z.-L. Xu, Y.-B. He, S. Abouali, M. Akbari Garakani, E. Kamali Heidari, F. Kang, J.-K. Kim, *Nano Energy*, 4 (2014) 88-96.
- [7] X.-B. Cheng, Q. Zhang, H.-F. Wang, G.-L. Tian, J.-Q. Huang, H.-J. Peng, M.-Q. Zhao, F. Wei, *Catal Today*, 249 (2015) 244-251.
- [8] W. Wang, Y. Sun, B. Liu, S. Wang, M. Cao, *Carbon*, 91 (2015) 56-65.
- [9] W. Li, M. Li, M. Wang, L. Zeng, Y. Yu, *Nano Energy*, 13 (2015) 693-701.

- [10] X. Jia, G. Zhang, T. Wang, X. Zhu, F. Yang, Y. Li, Y. Lu, F. Wei, *Journal of Materials Chemistry A*, 3 (2015) 15738-15744.
- [11] Z.-Y. Sui, C. Wang, Q.-S. Yang, K. Shu, Y.-W. Liu, B.-H. Han, G.G. Wallace, *Journal of Materials Chemistry A*, 3 (2015) 18229-18237.
- [12] X. Zhang, J. Zhou, C. Liu, X. Chen, H. Song, *Journal of Materials Chemistry A*, 4 (2016) 8837-8843.
- [13] H. Shan, X. Li, Y. Cui, D. Xiong, B. Yan, D. Li, A. Lushington, X. Sun, *Electrochimica Acta*, 205 (2016) 188-197.
- [14] X. Liu, J. Zhang, S. Guo, N. Pinna, *Journal of Materials Chemistry A*, 4 (2016) 1423-1431.
- [15] R.R. Gaddam, D. Yang, R. Narayan, K. Raju, N.A. Kumar, X.S. Zhao, *Nano Energy*, 26 (2016) 346-352.
- [16] S. Huang, J. Wang, Z. Pan, J. Zhu, P.K. Shen, *Journal of Materials Chemistry A*, 5 (2017) 7595-7602.
- [17] Y. Wang, Y. Wang, J. Liu, L. Pan, W. Tian, M. Wu, J. Qiu, *Carbon*, 122 (2017) 344-351.
- [18] L. Shi, Y. Chen, G. Chen, Y. Wang, X. Chen, H. Song, *Carbon*, 123 (2017) 186-192.
